# Supplementary material
Source: PubMed Central journal article supplement (PMC6428971)
Supplement: mmc1.pdf [file mmc1.pdf]

**Biophysical Journal, Volume 116**

**Supplemental Information**

**In Vitro Measurement and Modeling of Platelet Adhesion on VWF-Coated Surfaces in Channel Flow**

**Qin M. Qi, Eimear Dunne, Irene Oglesby, Ingmar Schoen, Antonio J. Ricco, Dermot Kenny, and Eric S.G. Shaqfeh**

## SUPPLEMENTAL INFORMATION

### Flow Cytometry

Surface receptors and platelet activation levels were quantified by flow cytometry using the commercially available Biocytex Platelet Gp/Receptors assay (Stago, Marseille, France). Whole blood is incubated with antibodies against CD62p (p-selectin, a measure of platelet activation), CD41(GPIIb/IIIa) and CD42b (GPIb) in the presence or absence of thrombin activating peptide. Receptor counts are extrapolated from a standard curve generated by measuring the Mean Fluorescent Intensity (MFI) of fluorescently labelled calibration beads according to the manufacturers instructions.

### Movies

Movie 1: Sample experimental movie at standard operating conditions. A total of 1000 frames are shown, but only the first 500 frames are used for analysis.

Movie 2: Sample simulation video,  $Ht = 30\%$ , only platelets near one wall are shown.

### Figures and Tables

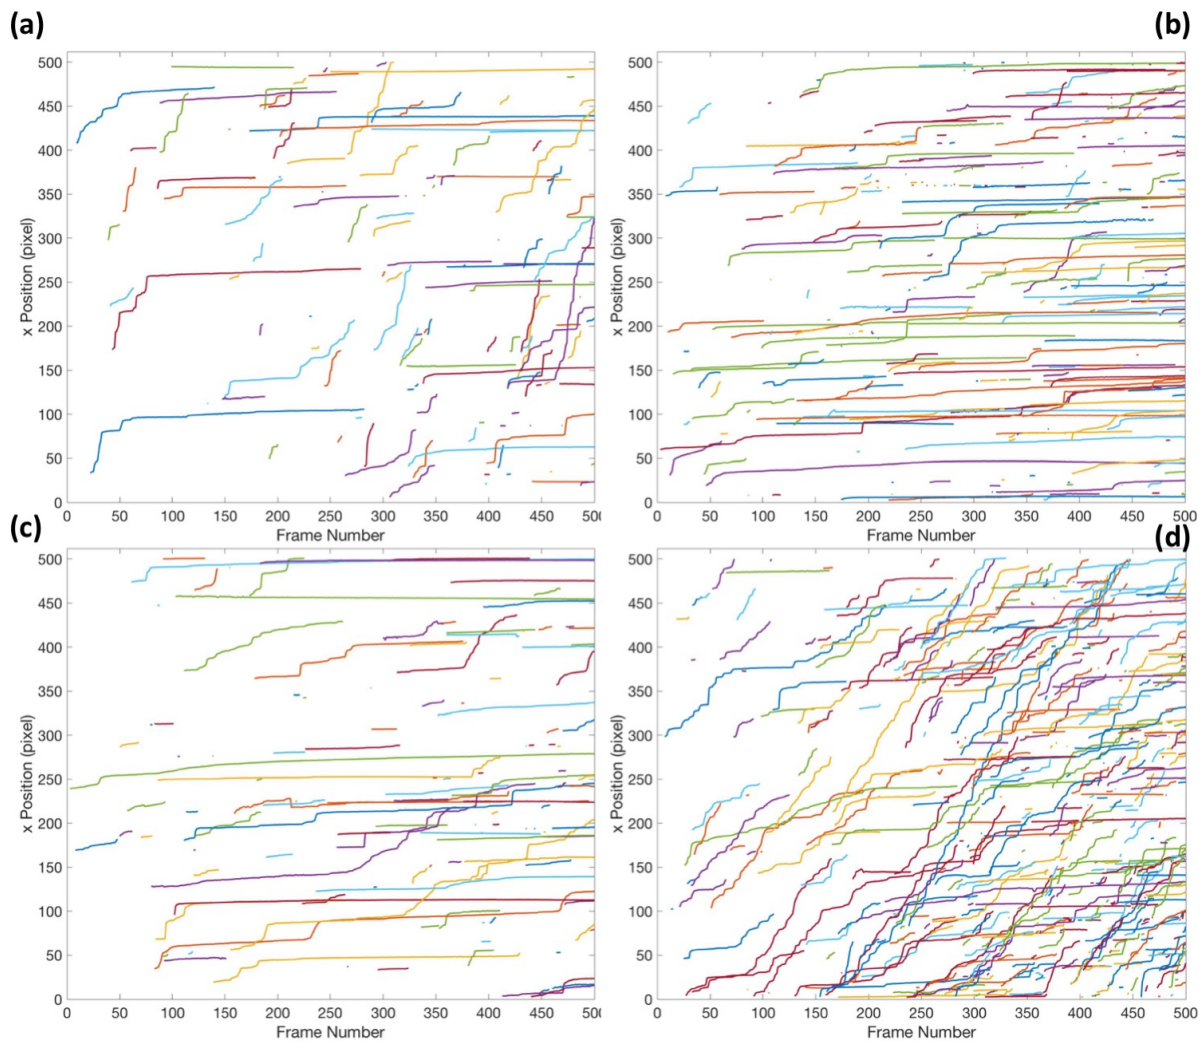

Figure 1: Sample platelet tracks obtained from one experimental run at various operating conditions. (a) AK2 at  $2 \mu\text{g/ml}$  (b)  $20\%$  hematocrit (c)  $500 \text{ s}^{-1}$  shear rate (d) ReoPro at  $2.5 \mu\text{g/ml}$ . Only  $20\%$  of the total number of platelet tracks (randomly selected) are shown.

| Name               | $\alpha$ | $\beta$ |
|--------------------|----------|---------|
| Donor 1            | 39525    | 47837   |
| Donor 2            | 47964    | 71482   |
| Donor 3            | 50421    | 40807   |
| Donor 4            | 24434    | 77477   |
| Mean               | 40586    | 59401   |
| Standard Deviation | 11736    | 17815   |

Table 1: Flow cytometry measurement of GPIb and GPIIb/IIIa receptor count.
